# Supplementary material
Source: PubMed Central journal article supplement (PMC9252508)
Supplement: mmc1.pdf [file mmc1.pdf]

# THE LANCET

## Healthy Longevity

### Supplementary appendix

This appendix formed part of the original submission and has been peer reviewed. We post it as supplied by the authors.

Supplement to: Shrotri M, Krutikov M, Nacer-Laidi H, et al. Duration of vaccine effectiveness against SARS-CoV-2 infection, hospitalisation, and death in residents and staff of long-term care facilities in England (VIVALDI): a prospective cohort study. *Lancet Healthy Longev* 2022; **3**: e470–80.

## SUPPLEMENTARY MATERIAL

### **Figure S1**

Cycle threshold values of a) Nucleocapsid and b) ORF1ab gene targets from viral isolates, by vaccination status

### **Figure S2**

Ct values of a) Nucleocapsid and b) ORF1ab gene targets in unvaccinated individuals before and during Delta variant predominance.

### **Table S1**

Person-time at risk and numbers of recorded PCR test results for staff and residents by prior COVID-19 status and vaccination exposure group.

### **Table S2**

Vaccine effectiveness estimates against infection, hospitalisation, and death for exposed residents, using the unvaccinated exposed group as the comparator.

### **Table S3**

Vaccine effectiveness estimates against infection for exposed staff, using the unvaccinated exposed group as the comparator; and descriptive data on hospitalisations and deaths in exposed staff.

### **Table S4**

Crude rates, adjusted hazard ratios, and vaccine effectiveness against infections, stratified by vaccine type, in unexposed residents and staff.

### **Table S5**

Crude rates, adjusted hazard ratios, and vaccine effectiveness against infections in the pre-Delta period in unexposed residents and staff.

### **Table S6**

Crude rates, adjusted hazard ratios, and vaccine effectiveness against hospitalisations, stratified by vaccine type, in unexposed residents and staff.

### **Table S7**

Crude rates, adjusted hazard ratios, and vaccine effectiveness against deaths, stratified by vaccine type, in unexposed residents.

### **Table S8**

Cycle threshold values of Nucleocapsid and ORF1ab gene targets from viral isolates, by vaccination status across the whole study period; and in unvaccinated individuals before and during Delta variant predominance.

Fig S1a

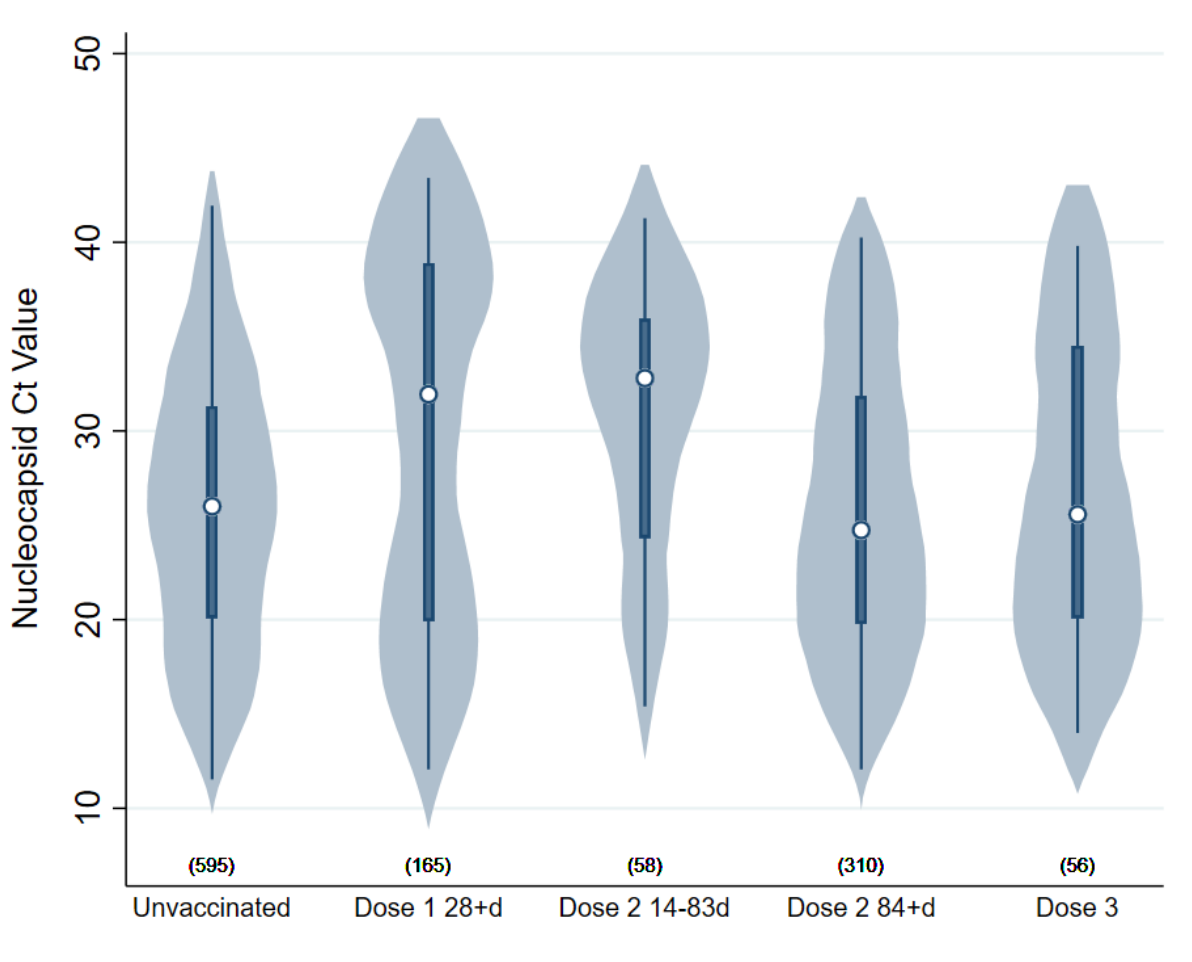

Fig S1b

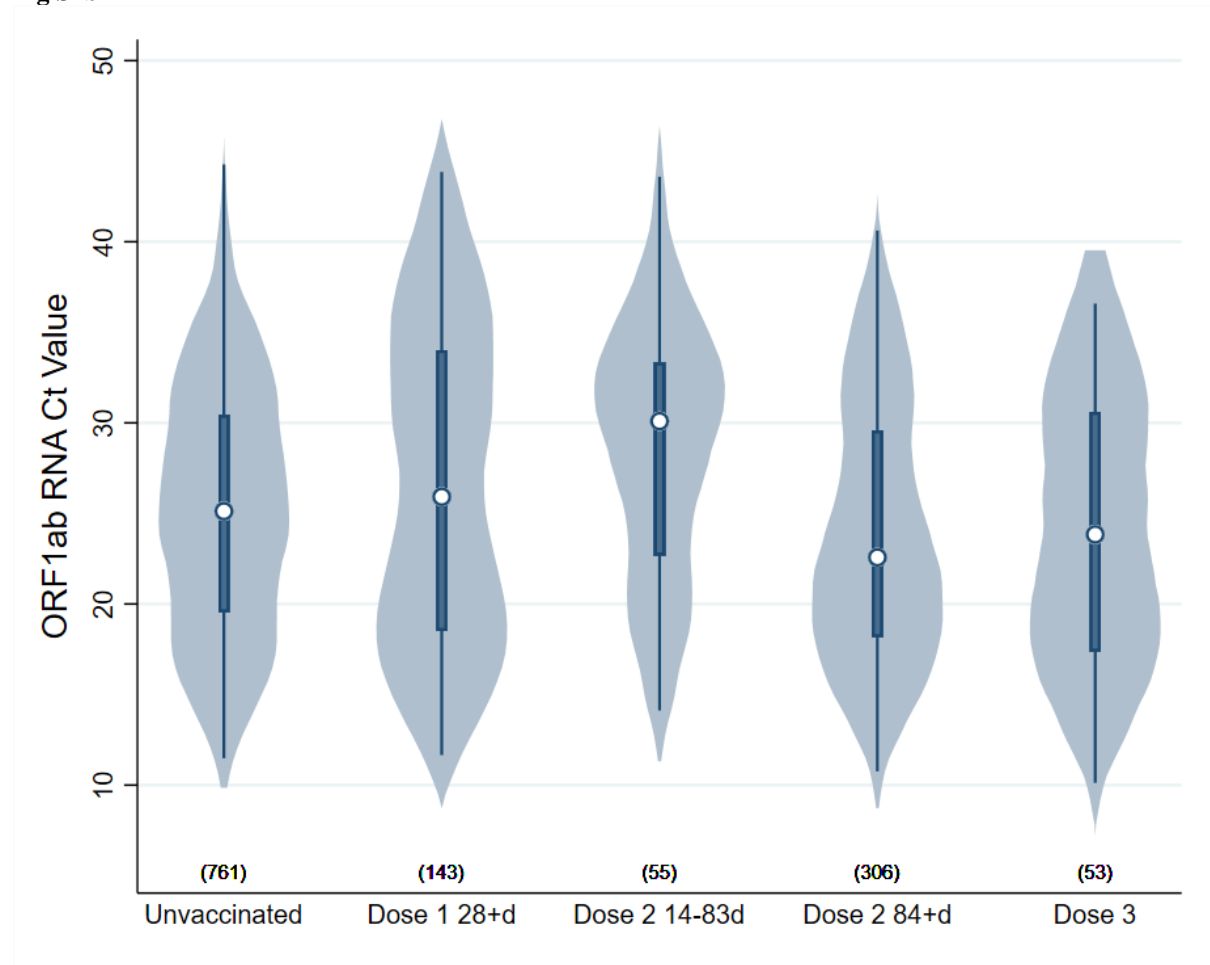

**Figure S2a**

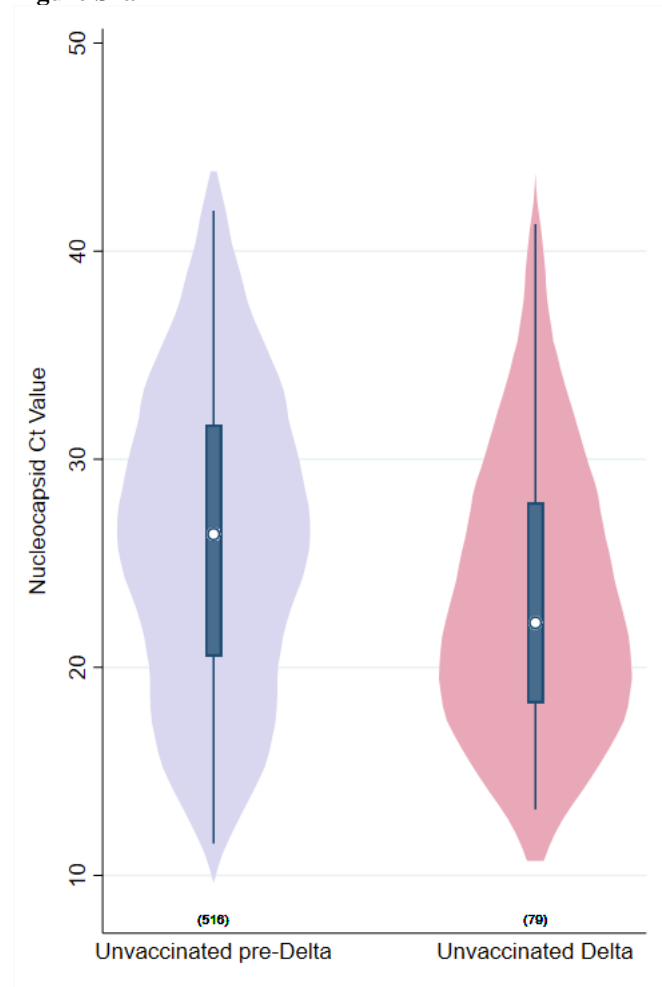

**Figure S2b**

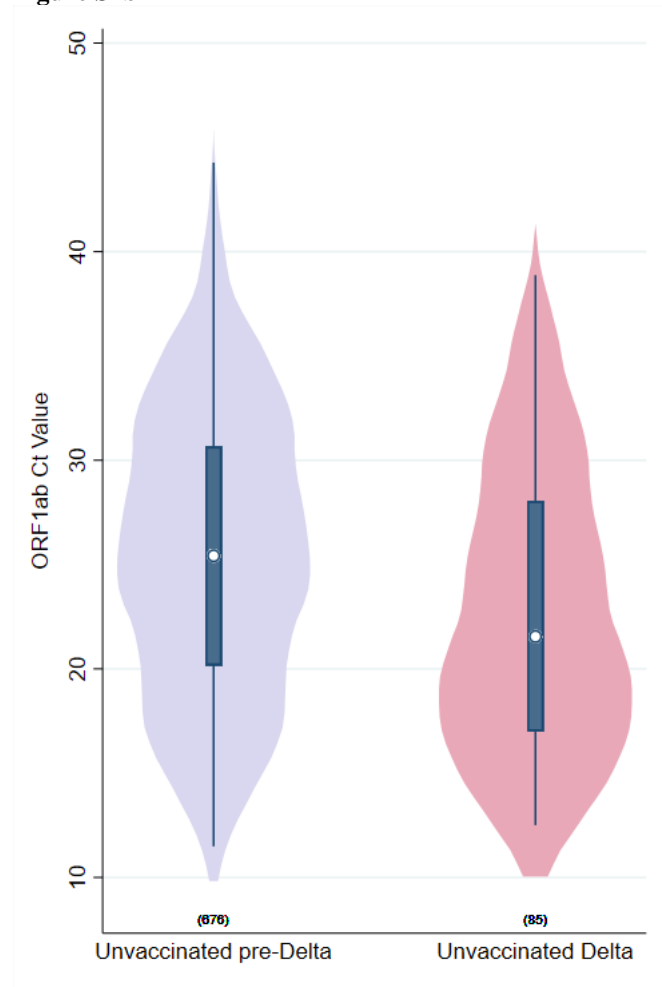

**Table S1**

| Prior SARS-CoV2 exposure | Vaccination exposure group | Person Days at Risk | Number of PCR test results | PCR testing rate per 1000 person days |
|--------------------------|----------------------------|---------------------|----------------------------|---------------------------------------|
| <b>RESIDENTS</b>         |                            |                     |                            |                                       |
| Unexposed                | Unvaccinated               | 523,032             | 22,654                     | 43.3                                  |
|                          | D1 0-27d                   | 206,819             | 10,011                     | 48.4                                  |
|                          | D1 28+d                    | 373,898             | 14,680                     | 39.3                                  |
|                          | D2 0-13d                   | 93,620              | 3,004                      | 32.1                                  |
|                          | D2 14-83d                  | 492,694             | 15,736                     | 31.9                                  |
|                          | D2 84+d                    | 813,540             | 34,311                     | 42.2                                  |
|                          | D3                         | 213,518             | 12,923                     | 60.5                                  |
| Exposed                  | Unvaccinated               | 88,174              | 2,771                      | 31.4                                  |
|                          | D1 0-27d                   | 37,241              | 1,311                      | 35.2                                  |
|                          | D1 28+d                    | 66,887              | 2,486                      | 37.2                                  |
|                          | D2 0-13d                   | 16,856              | 489                        | 29.0                                  |
|                          | D2 14-83d                  | 85,975              | 2,512                      | 29.2                                  |
|                          | D2 84+d                    | 133,079             | 5,021                      | 37.7                                  |
|                          | D3                         | 34,596              | 2,056                      | 59.4                                  |
| <b>Total</b>             |                            | 3,179,929           | 129,965                    | 40.9                                  |
| <b>STAFF</b>             |                            |                     |                            |                                       |
| Unexposed                | Unvaccinated               | 986,082             | 79,434                     | 80.6                                  |
|                          | D1 0-27d                   | 295,501             | 26,693                     | 90.3                                  |
|                          | D1 28+d                    | 523,450             | 44,503                     | 85.0                                  |
|                          | D2 0-13d                   | 133,742             | 11,734                     | 87.7                                  |
|                          | D2 14-83d                  | 676,226             | 59,722                     | 88.3                                  |
|                          | D2 84+d                    | 1,051,338           | 96,546                     | 91.8                                  |
|                          | D3                         | 214,360             | 25,857                     | 120.6                                 |
| Exposed                  | Unvaccinated               | 81,565              | 5,091                      | 62.4                                  |
|                          | D1 0-27d                   | 27,084              | 1,698                      | 62.7                                  |
|                          | D1 28+d                    | 47,838              | 4,012                      | 83.9                                  |
|                          | D2 0-13d                   | 12,249              | 1,083                      | 88.4                                  |
|                          | D2 14-83d                  | 61,543              | 5,597                      | 90.9                                  |
|                          | D2 84+d                    | 96,691              | 9,027                      | 93.4                                  |
|                          | D3                         | 23,109              | 2,669                      | 115.5                                 |
| <b>Total</b>             |                            | 4,230,778           | 373,666                    | 88.3                                  |

Table S2

| RESIDENTS                         |                    |             |                  |                                 |         |          |          |        |          |          |
|-----------------------------------|--------------------|-------------|------------------|---------------------------------|---------|----------|----------|--------|----------|----------|
| SARS-CoV2 Infections              |                    |             |                  |                                 |         |          |          |        |          |          |
| Prior SARS-CoV2 Exposure          | Vaccination Status | Person-days | Infections*      | Infection rate per 1000pd       | aHR     | L 95% CI | U 95% CI | VE     | L 95% CI | U 95% CI |
| Exposed                           | Unvaccinated       | 88174       | 29               | 0.329                           | 1 (ref) |          |          |        |          |          |
|                                   | D1 0-27d           | 37241       | 21               | 0.564                           | 1.056   | 0.455    | 2.449    | -5.6   | -144.9   | 54.5     |
|                                   | D1 28+d            | 66887       | 10               | 0.150                           | 0.884   | 0.369    | 2.119    | 11.6   | -111.9   | 63.1     |
|                                   | D2 0-13d           | 16856       | 0                | 0.000                           | .       | .        | .        | .      | .        | .        |
|                                   | D2 14-83d          | 85975       | 3                | 0.035                           | 2.228   | 0.603    | 8.239    | -122.8 | -723.9   | 39.7     |
|                                   | D2 84+d            | 133079      | 9                | 0.068                           | 0.771   | 0.302    | 1.966    | 22.9   | -96.6    | 69.8     |
|                                   | D3                 | 34596       | 0                | 0.000                           | .       | .        | .        | .      | .        | .        |
| COVID-19 related Hospitalisations |                    |             |                  |                                 |         |          |          |        |          |          |
| Prior SARS-CoV2 Exposure          | Vaccination Status | Person-days | Hospitalisations | Hospitalisation rate per 1000pd | aHR     | L 95% CI | U 95% CI | VE     | L 95% CI | U 95% CI |
| Exposed                           | Unvaccinated       | 89011       | 14               | 0.157                           | 1 (ref) |          |          |        |          |          |
|                                   | D1 0-27d           | 37689       | 3                | 0.080                           | 0.235   | 0.068    | 0.816    | 76.5   | 18.4     | 93.2     |
|                                   | D1 28+d            | 68142       | 4                | 0.059                           | 0.510   | 0.161    | 1.616    | 49.0   | -61.6    | 83.9     |
|                                   | D2 0-13d           | 17123       | 1                | 0.058                           | 1.013   | 0.134    | 7.653    | -1.3   | -665.3   | 86.6     |
|                                   | D2 14-83d          | 87342       | 0                | 0.000                           | .       | .        | .        | .      | .        | .        |
|                                   | D2 84+d            | 135472      | 2                | 0.015                           | 0.264   | 0.057    | 1.220    | 73.6   | -22.0    | 94.3     |
|                                   | D3                 | 35461       | 2                | 0.056                           | 0.299   | 0.065    | 1.370    | 70.1   | -37.0    | 93.5     |
| COVID-19 related Deaths           |                    |             |                  |                                 |         |          |          |        |          |          |
| Prior SARS-CoV2 Exposure          | Vaccination Status | Person-days | Deaths           | Death rate per 1000 pd          | aHR     | L 95% CI | U 95% CI | VE     | L 95% CI | U 95% CI |
| Exposed                           | Unvaccinated       | 90663       | 8                | 0.088                           | 1 (ref) |          |          |        |          |          |
|                                   | D1 0-27d           | 38167       | 3                | 0.079                           | 0.216   | 0.055    | 0.854    | 78.4   | 14.6     | 94.5     |



|           |        |   |       |       |       |        |       |         |      |
|-----------|--------|---|-------|-------|-------|--------|-------|---------|------|
| D1 28+d   | 69280  | 5 | 0.072 | 0.827 | 0.226 | 3.023  | 17.3  | -202.3  | 77.4 |
| D2 0-13d  | 17413  | 1 | 0.057 | 1.973 | 0.229 | 17.040 | -97.3 | -1604.0 | 77.1 |
| D2 14-83d | 88851  | 1 | 0.011 | 0.676 | 0.078 | 5.881  | 32.4  | -488.1  | 92.2 |
| D2 84+d   | 137905 | 1 | 0.007 | 0.328 | 0.034 | 3.212  | 67.2  | -221.2  | 96.6 |
| D3        | 35948  | 0 | 0.000 | .     | .     | .      | .     | .       | .    |

\*Where there were no events in a cell we have not included hazard ratios or vaccine effectiveness estimates due to sparse data.

**Table S3**

| <b>STAFF</b>                             |                    |             |                  |                                 |         |          |          |      |          |          |
|------------------------------------------|--------------------|-------------|------------------|---------------------------------|---------|----------|----------|------|----------|----------|
| <b>SARS-CoV2 Infections</b>              |                    |             |                  |                                 |         |          |          |      |          |          |
| Prior SARS-CoV2 Exposure                 | Vaccination Status | Person-days | Infections       | Infection rate per 1000pd       | aHR     | L 95% CI | U 95% CI | VE   | L 95% CI | U 95% CI |
| Exposed                                  | Unvaccinated       | 81565       | 40               | 0.490                           | 1 (ref) |          |          |      |          |          |
|                                          | D1 0-27d           | 27084       | 7                | 0.258                           | 0.428   | 0.181    | 1.012    | 57.2 | -1.2     | 81.9     |
|                                          | D1 28+d            | 47838       | 5                | 0.105                           | 0.425   | 0.158    | 1.144    | 57.5 | -14.4    | 84.2     |
|                                          | D2 0-13d           | 12249       | 1                | 0.082                           | 0.466   | 0.065    | 3.357    | 53.4 | -235.7   | 93.5     |
|                                          | D2 14-83d          | 61543       | 4                | 0.065                           | 0.573   | 0.199    | 1.653    | 42.7 | -65.3    | 80.1     |
|                                          | D2 84+d            | 96691       | 28               | 0.290                           | 0.932   | 0.484    | 1.796    | 6.8  | -79.6    | 51.6     |
|                                          | D3                 | 23109       | 3                | 0.130                           | 0.223   | 0.062    | 0.799    | 77.7 | 20.1     | 93.8     |
| <b>COVID-19 related Hospitalisations</b> |                    |             |                  |                                 |         |          |          |      |          |          |
| Prior SARS-CoV2 Exposure                 | Vaccination Status | Person-days | Hospitalisations | Hospitalisation rate per 1000pd | aHR     | L 95% CI | U 95% CI | VE   | L 95% CI | U 95% CI |
| Exposed                                  | Unvaccinated       | 85500       | 4                | 0.047                           |         |          |          |      |          |          |
|                                          | D1 0-27d           | 28273       | 0                | 0.000                           |         |          |          |      |          |          |
|                                          | D1 28+d            | 49231       | 0                | 0.000                           |         |          |          |      |          |          |
|                                          | D2 0-13d           | 12788       | 0                | 0.000                           |         |          |          |      |          |          |
|                                          | D2 14-83d          | 64376       | 0                | 0.000                           |         |          |          |      |          |          |
|                                          | D2 84+d            | 101008      | 0                | 0.000                           |         |          |          |      |          |          |
|                                          | D3                 | 24311       | 0                | 0.000                           |         |          |          |      |          |          |
| <b>COVID-19 related Deaths</b>           |                    |             |                  |                                 |         |          |          |      |          |          |
| Prior SARS-CoV2 Exposure                 | Vaccination Status | Person-days | Deaths           | Death rate per 1000pd           | aHR     | L 95% CI | U 95% CI | VE   | L 95% CI | U 95% CI |
| Exposed                                  | Unvaccinated       | 85799       | 0                | 0.000                           |         |          |          |      |          |          |
|                                          | D1 0-27d           | 28381       | 0                | 0.000                           |         |          |          |      |          |          |
|                                          | D1 28+d            | 49759       | 0                | 0.000                           |         |          |          |      |          |          |
|                                          | D2 0-13d           | 12821       | 0                | 0.000                           |         |          |          |      |          |          |
|                                          | D2 14-83d          | 64516       | 0                | 0.000                           |         |          |          |      |          |          |
|                                          | D2 84+d            | 101186      | 0                | 0.000                           |         |          |          |      |          |          |
|                                          | D3                 | 24390       | 0                | 0.000                           |         |          |          |      |          |          |

Table S4

| Residents              |                    |             |                  |                                     |       |          |          |       |          |          |
|------------------------|--------------------|-------------|------------------|-------------------------------------|-------|----------|----------|-------|----------|----------|
| Prior SARS-CoV2 Status | Vaccination Status | Person-days | Infection Events | Infection rate per 1000 person-days | aHR   | L 95% CI | U 95% CI | VE    | L 95% CI | U 95% CI |
|                        |                    |             |                  |                                     |       |          |          |       |          |          |
|                        | AZ D1 0-27d        | 141935      | 263              | 1.853                               | 0.733 | 0.497    | 1.081    | 26.7  | -8.1     | 50.3     |
|                        | AZ D1 28+d         | 261294      | 81               | 0.310                               | 0.430 | 0.280    | 0.662    | 57.0  | 33.8     | 72.0     |
|                        | AZ D2 0-13d        | 64982       | 11               | 0.169                               | 1.505 | 0.540    | 4.194    | -50.5 | -319.4   | 46.0     |
|                        | AZ D2 14-83d       | 341448      | 9                | 0.026                               | 0.301 | 0.130    | 0.700    | 69.9  | 30.0     | 87.0     |
|                        | AZ D2 84+d         | 539330      | 207              | 0.384                               | 0.809 | 0.533    | 1.229    | 19.1  | -22.9    | 46.7     |
|                        | AZ + mRNA D3*      | 132964      | 43               | 0.323                               | 0.272 | 0.154    | 0.481    | 72.8  | 51.9     | 84.6     |
|                        | mRNA D1 0-27d      | 64884       | 194              | 2.990                               | 0.953 | 0.598    | 1.520    | 4.7   | -52.0    | 40.2     |
|                        | mRNA D1 28+d       | 112604      | 67               | 0.595                               | 0.492 | 0.298    | 0.810    | 50.8  | 19.0     | 70.2     |
|                        | mRNA D2 0-13d      | 28638       | 1                | 0.035                               | 0.122 | 0.017    | 0.864    | 87.8  | 13.6     | 98.3     |
|                        | mRNA D2 14-83d     | 151246      | 8                | 0.053                               | 0.559 | 0.274    | 1.140    | 44.1  | -14.0    | 72.6     |
|                        | mRNA D2 84+d       | 274210      | 80               | 0.292                               | 0.702 | 0.432    | 1.140    | 29.8  | -14.0    | 56.8     |
|                        | mRNA D3            | 80554       | 25               | 0.310                               | 0.279 | 0.161    | 0.483    | 72.1  | 51.7     | 83.9     |
| Staff                  |                    |             |                  |                                     |       |          |          |       |          |          |
| Prior SARS-CoV2 Status | Vaccination Status | Person-days | Infection Events | Infection rate per 1000 person-days | aHR   | L 95% CI | U 95% CI | VE    | L 95% CI | U 95% CI |
|                        |                    |             |                  |                                     |       |          |          |       |          |          |
|                        | AZ D1 0-27d        | 134378      | 134              | 0.997                               | 1.103 | 0.802    | 1.518    | -10.3 | -51.8    | 19.8     |
|                        | AZ D1 28+d         | 267114      | 56               | 0.210                               | 0.673 | 0.488    | 0.926    | 32.7  | 7.4      | 51.2     |
|                        | AZ D2 0-13d        | 60405       | 3                | 0.050                               | 0.411 | 0.131    | 1.284    | 58.9  | -28.4    | 86.9     |
|                        | AZ D2 14-83d       | 313395      | 41               | 0.131                               | 0.597 | 0.384    | 0.928    | 40.3  | 7.2      | 61.6     |
|                        | AZ D2 84+d         | 464836      | 217              | 0.467                               | 0.632 | 0.505    | 0.792    | 36.8  | 20.8     | 49.5     |
|                        | AZ + mRNA D3*      | 73145       | 21               | 0.287                               | 0.239 | 0.150    | 0.380    | 76.1  | 62.0     | 85.0     |

|                |        |     |       |       |       |       |      |       |      |
|----------------|--------|-----|-------|-------|-------|-------|------|-------|------|
| mRNA D1 0-27d  | 161123 | 217 | 1.347 | 1.035 | 0.807 | 1.327 | -3.5 | -32.7 | 19.3 |
| mRNA D1 28+d   | 256336 | 94  | 0.367 | 0.591 | 0.453 | 0.771 | 40.9 | 22.9  | 54.7 |
| mRNA D2 0-13d  | 73337  | 17  | 0.232 | 0.407 | 0.251 | 0.659 | 59.3 | 34.1  | 74.9 |
| mRNA D2 14-83d | 362831 | 39  | 0.107 | 0.332 | 0.234 | 0.469 | 66.8 | 53.1  | 76.6 |
| mRNA D2 84+d   | 586502 | 186 | 0.317 | 0.547 | 0.439 | 0.683 | 45.3 | 31.7  | 56.1 |
| mRNA D3        | 141215 | 34  | 0.241 | 0.211 | 0.146 | 0.304 | 78.9 | 69.6  | 85.4 |

\*This category refers to individuals who received the AZ vaccine for Doses 1 and 2, followed by an mRNA vaccine as Dose 3.

**Table S5**

| <b>Residents</b>       |                    |             |                   |                                     |         |          |          |        |          |          |
|------------------------|--------------------|-------------|-------------------|-------------------------------------|---------|----------|----------|--------|----------|----------|
| Prior SARS-CoV2 Status | Vaccination Status | Person-days | Infection Events* | Infection rate per 1000 person-days | aHR     | L 95% CI | U 95% CI | VE     | L 95% CI | U 95% CI |
| Unexposed              | Unvaccinated       | 315640      | 788               | 2.500                               | 1 (ref) |          |          |        |          |          |
|                        | D1 0-27d           | 203526      | 455               | 2.240                               | 0.572   | 0.394    | 0.831    | 42.8   | 16.9     | 60.6     |
|                        | D1 28+d            | 315271      | 132               | 0.420                               | 0.224   | 0.132    | 0.380    | 77.6   | 62.0     | 86.8     |
|                        | D2 0-13d           | 87389       | 11                | 0.130                               | 0.325   | 0.109    | 0.964    | 67.5   | 3.6      | 89.1     |
|                        | D2 14-83d          | 17084       | 5                 | 0.290                               | 0.553   | 0.251    | 1.216    | 44.7   | -21.6    | 74.9     |
|                        | D2 84+d            | 62          | 0                 | 0.000                               | .       | .        | .        | .      | .        | .        |
| <b>Staff</b>           |                    |             |                   |                                     |         |          |          |        |          |          |
| Prior SARS-CoV2 Status | Vaccination Status | Person-days | Infection Events  | Infection rate per 1000 person-days | aHR     | L 95% CI | U 95% CI | VE     | L 95% CI | U 95% CI |
| Unexposed              | Unvaccinated       | 513181      | 840               | 1.640                               | 1 (ref) |          |          |        |          |          |
|                        | D1 0-27d           | 261759      | 334               | 1.280                               | 0.747   | 0.597    | 0.935    | 25.3   | 6.5      | 40.3     |
|                        | D1 28+d            | 363423      | 116               | 0.320                               | 0.388   | 0.293    | 0.514    | 61.2   | 48.6     | 70.7     |
|                        | D2 0-13d           | 100529      | 10                | 0.100                               | 0.173   | 0.092    | 0.324    | 82.7   | 67.6     | 90.8     |
|                        | D2 14-83d          | 91272       | 23                | 0.250                               | 0.302   | 0.195    | 0.469    | 69.8   | 53.1     | 80.5     |
|                        | D2 84+d            | 1936        | 2                 | 1.030                               | 3.975   | 0.905    | 17.457   | -297.5 | -1645.7  | 9.5      |

\*Where there were no events in a cell we have not included hazard ratios or vaccine effectiveness estimates due to sparse data.

Table S6

| Residents              |                    |             |                          |                                           |         |          |          |      |          |          |
|------------------------|--------------------|-------------|--------------------------|-------------------------------------------|---------|----------|----------|------|----------|----------|
| Prior SARS-CoV2 Status | Vaccination Status | Person-days | Hospitalisation Events** | Hospitalisation rate per 1000 person-days | aHR     | L 95% CI | U 95% CI | VE   | L 95% CI | U 95% CI |
| Unexposed              | Unvaccinated       | 544118      | 225                      | 0.414                                     | 1 (ref) |          |          |      |          |          |
|                        | AZ D1 0-27d        | 151077      | 47                       | 0.311                                     | 0.357   | 0.220    | 0.581    | 64.3 | 41.9     | 78.0     |
|                        | AZ D1 28+d         | 280201      | 30                       | 0.107                                     | 0.419   | 0.251    | 0.697    | 58.1 | 30.3     | 74.9     |
|                        | AZ D2 0-13d        | 69998       | 4                        | 0.057                                     | 0.441   | 0.099    | 1.961    | 55.9 | -96.1    | 90.1     |
|                        | AZ D2 14-83d       | 366426      | 3                        | 0.008                                     | 0.133   | 0.043    | 0.412    | 86.7 | 58.8     | 95.7     |
|                        | AZ D2 84+d         | 583626      | 45                       | 0.077                                     | 0.488   | 0.289    | 0.823    | 51.2 | 17.7     | 71.1     |
|                        | AZ + mRNA D3*      | 144716      | 5                        | 0.035                                     | 0.065   | 0.026    | 0.167    | 93.5 | 83.3     | 97.4     |
|                        | mRNA D1 0-27d      | 67230       | 20                       | 0.297                                     | 0.328   | 0.166    | 0.646    | 67.2 | 35.4     | 83.4     |
|                        | mRNA D1 28+d       | 121698      | 22                       | 0.181                                     | 0.450   | 0.231    | 0.878    | 55.0 | 12.2     | 76.9     |
|                        | mRNA D2 0-13d      | 30666       | 0                        | 0.000                                     | .       | .        | .        | .    | .        | .        |
|                        | mRNA D2 14-83d     | 161276      | 1                        | 0.006                                     | 0.082   | 0.011    | 0.602    | 91.8 | 39.8     | 98.9     |
|                        | mRNA D2 84+d       | 292101      | 14                       | 0.048                                     | 0.338   | 0.179    | 0.638    | 66.2 | 36.2     | 82.1     |
| mRNA D3                | 86703              | 7           | 0.081                    | 0.162                                     | 0.073   | 0.359    | 83.8     | 64.1 | 92.7     |          |
| Staff                  |                    |             |                          |                                           |         |          |          |      |          |          |
| Prior SARS-CoV2 Status | Vaccination Status | Person-days | Hospitalisation Events** | Hospitalisation rate per 1000 person-days | aHR     | L 95% CI | U 95% CI | VE   | L 95% CI | U 95% CI |
| Unexposed              | Unvaccinated       | 1046689     | 38                       | 0.036                                     | 1 (ref) |          |          |      |          |          |
|                        | AZ D1 0-27d        | 146790      | 3                        | 0.020                                     | 0.406   | 0.118    | 1.397    | 59.4 | -39.7    | 88.2     |
|                        | AZ D1 28+d         | 296396      | 4                        | 0.014                                     | 0.790   | 0.289    | 2.159    | 21.0 | -115.9   | 71.1     |
|                        | AZ D2 0-13d        | 67057       | 0                        | 0.000                                     | .       | .        | .        | .    | .        | .        |
|                        | AZ D2 14-83d       | 347427      | 0                        | 0.000                                     | .       | .        | .        | .    | .        | .        |
|                        | AZ D2 84+d         | 518779      | 4                        | 0.008                                     | 0.105   | 0.031    | 0.357    | 89.5 | 64.3     | 96.9     |
|                        | AZ + mRNA D3*      | 81261       | 0                        | 0.000                                     | .       | .        | .        | .    | .        | .        |
|                        | mRNA D1 0-27d      | 169075      | 3                        | 0.018                                     | 0.321   | 0.092    | 1.117    | 67.9 | -11.7    | 90.8     |
|                        | mRNA D1 28+d       | 276699      | 0                        | 0.000                                     | .       | .        | .        | .    | .        | .        |

|                |        |   |       |       |       |       |      |      |      |
|----------------|--------|---|-------|-------|-------|-------|------|------|------|
| mRNA D2 0-13d  | 78805  | 0 | 0.000 | .     | .     | .     | .    | .    | .    |
| mRNA D2 14-83d | 390613 | 0 | 0.000 | .     | .     | .     | .    | .    | .    |
| mRNA D2 84+d   | 633995 | 3 | 0.005 | 0.079 | 0.021 | 0.307 | 92.1 | 69.3 | 97.9 |
| mRNA D3        | 155440 | 1 | 0.006 | 0.067 | 0.006 | 0.756 | 93.3 | 24.4 | 99.4 |

\* This category refers to individuals who received the AZ vaccine for Doses 1 and 2, followed by an mRNA vaccine as Dose 3.

\*\*Where there were no events in a cell we have not included hazard ratios or vaccine effectiveness estimates due to sparse data.

**Table S7**

| Residents              |                    |             |          |                                 |         |          |          |      |          |          |
|------------------------|--------------------|-------------|----------|---------------------------------|---------|----------|----------|------|----------|----------|
| Prior SARS-CoV2 Status | Vaccination Status | Person-days | Deaths** | Death rate per 1000 person-days | aHR     | L 95% CI | U 95% CI | VE   | L 95% CI | U 95% CI |
| Unexposed              | Unvaccinated       | 556900      | 293      | 0.526                           | 1 (ref) |          |          |      |          |          |
|                        | AZ D1 0-27d        | 154656      | 58       | 0.375                           | 0.160   | 0.104    | 0.245    | 84.0 | 75.5     | 89.6     |
|                        | AZ D1 28+d         | 289546      | 36       | 0.124                           | 0.324   | 0.187    | 0.563    | 67.6 | 43.7     | 81.3     |
|                        | AZ D2 0-13d        | 72112       | 0        | 0.000                           | .       | .        | .        | .    | .        | .        |
|                        | AZ D2 14-83d       | 377974      | 2        | 0.005                           | 0.055   | 0.013    | 0.239    | 94.5 | 76.1     | 98.7     |
|                        | AZ D2 84+d         | 600790      | 33       | 0.055                           | 0.371   | 0.196    | 0.699    | 62.9 | 30.1     | 80.4     |
|                        | AZ + mRNA D3*      | 148276      | 1        | 0.007                           | 0.013   | 0.002    | 0.098    | 98.7 | 90.2     | 99.8     |
|                        | mRNA D1 0-27d      | 67906       | 36       | 0.530                           | 0.271   | 0.153    | 0.480    | 72.9 | 52.0     | 84.7     |
|                        | mRNA D1 28+d       | 123441      | 31       | 0.251                           | 0.287   | 0.164    | 0.503    | 71.3 | 49.7     | 83.6     |
|                        | mRNA D2 0-13d      | 31095       | 2        | 0.064                           | 0.292   | 0.066    | 1.284    | 70.8 | -28.4    | 93.4     |
|                        | mRNA D2 14-83d     | 163794      | 0        | 0.000                           | .       | .        | .        | .    | .        | .        |
|                        | mRNA D2 84+d       | 296163      | 13       | 0.044                           | 0.331   | 0.153    | 0.715    | 66.9 | 28.5     | 84.7     |
| mRNA D3                | 87954              | 2           | 0.023    | 0.047                           | 0.011   | 0.205    | 95.3     | 79.5 | 98.9     |          |

\*This category refers to individuals who received the AZ vaccine for Doses 1 and 2, followed by an mRNA vaccine as Dose 3.

\*\*Where there were no events in a cell we have not included hazard ratios or vaccine effectiveness estimates due to sparse data.



**Table S8**

| <b>Vaccination Status</b> | <b>Nucleocapsid RNA target</b> |                  |            | <b>ORF1ab RNA target</b> |                  |            |
|---------------------------|--------------------------------|------------------|------------|--------------------------|------------------|------------|
|                           | <b>n</b>                       | <b>Median Ct</b> | <b>IQR</b> | <b>n</b>                 | <b>Median Ct</b> | <b>IQR</b> |
| Unvaccinated              | 595                            | 26.0             | 20.1, 31.3 | 761                      | 25.1             | 19.6, 30.4 |
| Dose 1 28+d               | 165                            | 31.9             | 19.9, 38.9 | 143                      | 25.9             | 18.5, 34.0 |
| Dose 2 14-83d             | 58                             | 32.8             | 24.4, 35.9 | 55                       | 30.1             | 22.7, 33.3 |
| Dose 2 84+d               | 310                            | 24.7             | 19.8, 31.8 | 306                      | 22.6             | 18.2, 29.6 |
| Dose 3                    | 56                             | 25.6             | 20.1, 34.5 | 53                       | 23.8             | 17.4, 30.6 |
| Unvaccinated pre-Delta    | 516                            | 26.4             | 20.5, 31.7 | 676                      | 25.4             | 20.2, 30.6 |
| Unvaccinated Delta        | 79                             | 22.1             | 18.3, 27.9 | 85                       | 21.6             | 17.0, 28.0 |
